# Supplementary material for: Cutting out the middleman: Calibrating and validating a dynamicvegetation model (ED2-PROSPECT5) using remotely sensed surfacereflectance
Source: Copernicus journal article supplement (doi:10.5194/gmd-2020-324), 2020-10-12
Supplement: Supplementary file [file gmd-2020-324-AC2-supplement.pdf]

Supplementary figures for reviewer T. Quaife

February 5, 2021

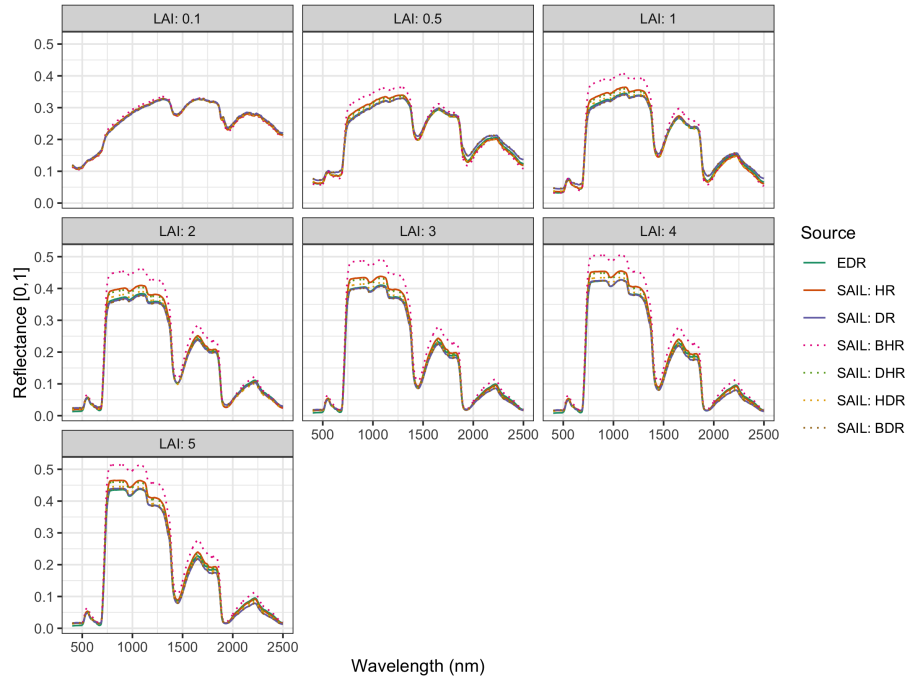

Figure 1: Comparison of EDR and PRO4SAIL simulations for single-cohort canopies over a range of leaf area indices (LAI). These simulations assume common PROSPECT parameters, and sun-sensor geometries (nadir sensor, cosine solar zenith angle of 0.85). For EDR, we use a single cohort with the prescribed LAI. “SAIL: HR” is the “hemispherical reflectance” (“blue-sky albedo”), calculated (as in EDR) as the average of directional-hemispherical (DHR) and bi-hemispherical (BHR) reflectance streams weighted by the direct sky fraction (0.9; same value as in EDR). Similarly, “SAIL: DR” is the “directional reflectance”, calculated analogously from the bi-directional (BDR) and hemispherical-directional (HDR) reflectance streams. Individual SAIL fluxes are shown with dotted lines. Here,  $\cos(\text{solar zenith angle})$  is 0.85 – a typical value for summer in our study domain.

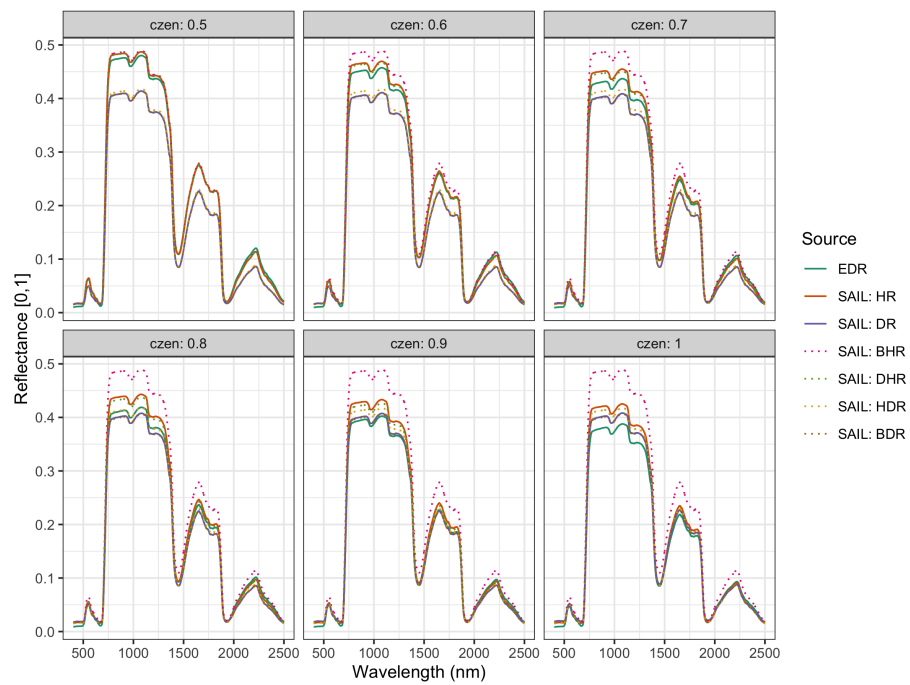

Figure 2: (New supplementary figure) Same as above, but over a range of solar geometries ( $czen = \cosine$  of solar zenith angle). All simulations use a common LAI of 3.
